# Supplementary material for: Airborne coherent wind lidar measurements of the momentum flux profile from orographically induced gravity waves
Source: Copernicus journal article supplement (doi:10.5194/amt-2022-234), 2022-08-17
Supplement: Supplementary file [file amt-2022-234-AC1-supplement.pdf]

The very thoughtful comments of anonymous reviewer #1 (Referee #1, received on 13 October 2022, shown in black) are highly appreciated, as they significantly contribute to improving the paper manuscript. Based on the given comments, we revised the paper manuscript extensively, especially chapter 4 (results). Our corresponding answers to the reviewer's comments are given below in blue color, and the performed changes in the manuscript are highlighted in green color.

## **Interactive comment on “Airborne coherent wind lidar measurements of the momentum flux profile from orographically induced gravity waves” by B.**

**Witschas et al.**

**(Author response)**

### **Reviewer statement:**

The article reports on mountain-wave momentum-flux (MF) measurements performed during the GW-LCYCLE II airborne campaign above Scandinavia. A novel scanning pattern technique, which has been specifically designed to retrieve gravity-wave momentum fluxes, was used with the 2 $\mu$ m lidar flown onboard the Falcon aircraft during one leg flight across the Scandinavian mountains on January 28, 2016. This technique is based on classical radar MF measurements, where the beam is pointed obliquely in two opposite directions, which allows to measure both the wind vertical component and its horizontal component along the line of sight. During that leg, the HALO aircraft performed a coordinated flight, flying 2 km below the Falcon aircraft, therefore allowing a direct comparison first between lidar and in-situ winds, and then between gravity-wave momentum fluxes. While the former comparison is excellent, the later is somewhat disappointing.

The article is well written and presents a very promising technique for measuring gravity wave MF from an airborne platform. The detailed 2D perspective that it provides on MF is notably really impressive. I therefore support the publication of the article in AMT. Yet, I have several concerns on the paper, notably on how the gravity-wave observations are (or are not) interpreted, and ultimately on the significance of the momentum flux comparison. I think that these concerns need to be addressed before publication.

### **Major concerns**

My main major concern is associated with Figure 8a, where gravity waves MF derived from the 2 $\mu$ m wind lidar are shown for different altitudes. One striking feature of these fluxes is that they present oscillations around 0. This feature is simply ignored in the paragraph devoted to the figure (lines 269-287), while it has profound implications on the type of waves that are observed. Indeed, one can imagine two situations associated with MFs that oscillate around 0: it may either be associated with freely-propagating gravity-wave packets with systematical horizontal direction of propagation almost perpendicular to the aircraft leg (which seems rather unlikely in this mountain-wave case), or it may be trapped waves for which  $u'$  measured along the wave propagation direction and  $w'$  disturbances are in phase quadrature. This latter situation seems to me very plausible in the considered case: it is for instance consistent with the (almost) vertical structure of the short-scale wave disturbances displayed on Figure 7c) and d). I also note that the authors very briefly proposed the same interpretation on lines 312-313 (while commenting Fig. 9) and in the conclusions (lines 342-343). Now, if most of the waves observed during the aircraft leg were trapped waves, one would expect that the associated leg-averaged MF should nearly vanish. I therefore wonder whether leg-averaged momentum fluxes shown in Figure 9 are not simply residuals from the almost zero-mean timeseries displayed in Figure 8a), which might explain the observed discrepancy between the lidar and in-situ MF estimates. In other words, despite the excellent agreement between both wind measurements, this leg might not be the best case to compare gravity-wave momentum fluxes.

Thanks a lot for this comment. As a few of the shown results were already presented in Gisinger et al. 2021, we originally aimed at discussing the novel measurement technique and the corresponding retrieval algorithm, instead of elaborating on the actual atmospheric mechanism that triggers the observed phenomenon. However, we fully agree that the scientific discussion of the prevailing gravity wave situation was not detailed enough in the previous version of the manuscript. Thus, we carefully revised our analysis and the corresponding discussion presented in Section 4. In particular, we performed the following “major” modifications:

- As suggested by Ehard et al. 2015, we applied a Butterworth filter to retrieve the respective perturbations in  $u'$  and  $w'$ . In particular, this was done for two different wave classes with horizontal wavelengths of smaller than 30 km, and for horizontal wavelengths of larger than 30 km. With that, it is possible to distinguish between the contribution of the longer wavelengths that are able to propagate through the troposphere and can transport momentum and the one of the shorter wavelengths that do not transport momentum vertically at all. With that, we address both valuable comments of the referee about the actual gravity wave situation in the TIL region and the propagation direction, as well as the mentioned discrepancy with the applied filter method used to retrieve  $u'$  and  $w'$ .
- With the two defined wave classes, we adapted the previous Fig. 7 according to:

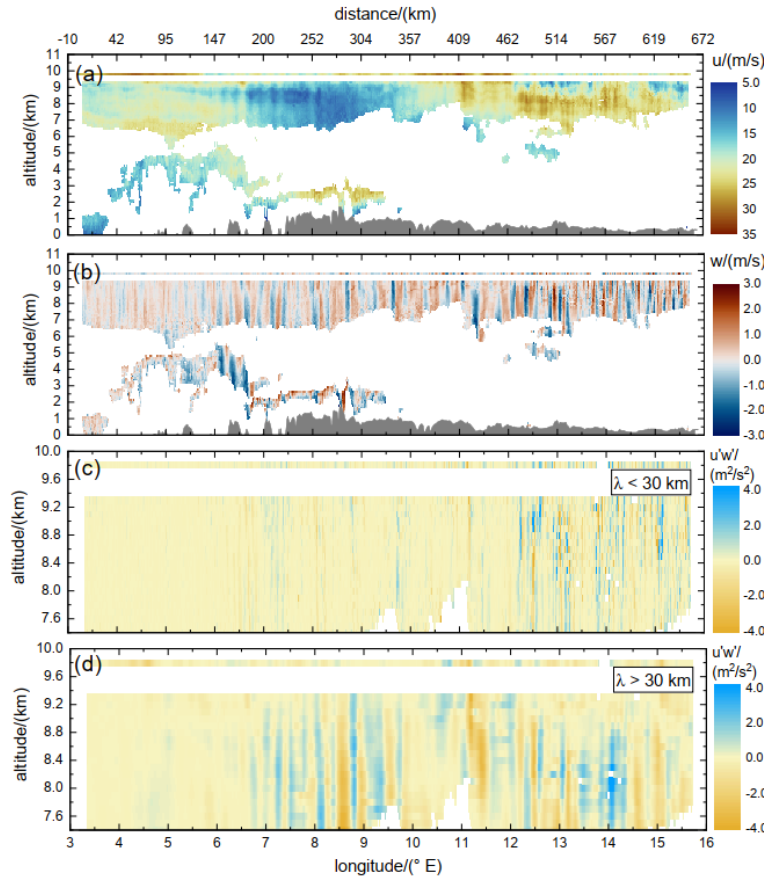

**Figure 8.** Horizontal wind speed along flight direction  $u_{\text{par}}$  (a), vertical wind speed (b), as well as  $u'_{\text{par}}w'$  for the short waves with a wavelength smaller than 30 km (c) and longer than 30 km (d) retrieved from the 2- $\mu\text{m}$  DWL while operating in MF-mode on FL3 performed on 28 January 2016 (see also table 1, and Fig. 1). The thin line at 9.8 km altitude indicates the corresponding wind speed measured in-situ by the nose-boom of the aircraft. The orography is denoted by the gray area. For reasons of clarity, only the altitude range between 7.5 km and 10 km with almost full data coverage is depicted in panel (c) and (d).

Based on the shown observations, we further characterize the potential gravity wave situation that can explain our observations and we looked into more detail into the difference that was found in MF between HALO and the wind lidar by means of  $u'w'$ :

- Based on the vertical wind speed measurement shown in Fig. 5:

Analyzing the spectral structure of the excited GWs, an interesting behavior can be observed between  $5^\circ$  E to  $8^\circ$  E (see also the light-gray line in Fig. 5). Below altitudes of  $\approx 8.5$  km, and thus below the thermal tropopause, which is determined using European Centre for Medium-Range Weather Forecasts (ECMWF) model data, the waves have a horizontal wavelength of about 20 km, whereas the ones in or rather above the tropopause have a horizontal wavelength of only 10 km and smaller. As shown by Gisinger et al. (2020), this behavior can be explained by the occurrence of interfacial waves with wavelengths smaller than 10 km, that are induced by the partial reflection of longer waves at the TIL region. Currently, further numerical simulations are ongoing to investigate if the generation and downward propagation of secondary waves in the stratosphere also contribute to the observed phenomenon.

- Based on the  $u$ ,  $w$  and  $u'w'$  2D plots:

The horizontal wind speed along the flight track upar (Fig. 8, a) ... The obvious large-scale wave structures have a wavelength of about 400 km with upstream tilted phase lines in the troposphere. ... . In addition to that, the large-scale wave structures are superimposed by small-scale waves with vertical phase lines, which are more clearly visible in the vertical wind measurements as they are shown in panel (b) of Fig. 8.

The vertical wind speed data looks comparable to the one measured on FL2 (see also Fig. 5), which confirms the stable atmospheric conditions during the flight period. The vertical wind speed varies between  $-3$  m/s and  $3$  m/s and shows horizontal scales in the range between 5 and 30 km. ... Furthermore, the horizontal scales of the waves in the tropopause region, for instance in the upper range gates of the  $2\text{-}\mu\text{m}$  DWL data (9.0 to 9.2 km), as well as in the in-situ data at flight level (9.8 km), are significantly smaller ( $\approx 5$  km) compared to the one in the troposphere. A similar behavior was already observed during FL2 (Fig. 5) and points to trapped and downstream propagation waves in the TIL region.

From panel (c), it is obvious that the short-wave  $u'w'$  yields amplitudes of  $\approx \pm 4 \text{ m}^2/\text{s}^2$ , and that they are mainly visible in the downstream region ( $12^\circ$  E to  $15.5^\circ$  E). It can also be recognized that the amplitudes are larger for altitudes above the tropopause ( $\approx 8.8$  km), with alternating positive and negative signals of similar amplitude. Thus, the leg-averaged MF of these short waves is expected to be close to zero as shown later in Fig. 9.

For the long-wave  $u'w'$  (d), similar amplitudes of  $\approx \pm 4 \text{ m}^2/\text{s}^2$  are reached, however, starting further upstream at around  $7^\circ$  E. Additionally, it can be realized that, as opposed to the short-wave case, the amplitudes get significantly smaller at the tropopause ( $\approx 8.8$  km) and above, except for the feature appearing at  $11.4^\circ$  E. Furthermore, in the tropopause region between 8.0 and 8.8 km, the positive values of  $u'w'$  predominate, which gives reason to expect positive momentum fluxes, pointing to the reflection of waves. That these features are restricted to the tropopause region is for instance nicely visible at  $12.5^\circ$  E and  $13.0^\circ$  E, where two distinct positive  $u'w'$ -features extend from 8.0 and 8.8 km whereas they are positive or rather zero below and above.

- Based on the MF profile shown in Fig. 9:

The flux profile of the short waves (orange) is undulating around zero due to the phase relationship of their horizontal and vertical velocity perturbations. Thus, GWs with a wavelength of smaller than 30 km can be concluded to not transport momentum vertically. On the other hand, the flux profile of the long waves exhibits prominent features. Below 8 km, MFx is slightly negative, indicating an upward propagation, whereas MFx is positive between 8.0 km and 8.8 km in the tropopause region, suggesting downward propagation. This points to a reflection or rather

trapping of the MWs in the vicinity of the TIL region. The largest MFx values of  $\approx 0.05$  Pa are found at an altitude of 8.2 km.

- new Fig. 10 shows  $u'w'$  of HALO in-situ and wind lidar along the flight leg for small (<30km) and large (>30km scales) to shed light on the differences found in the MF:

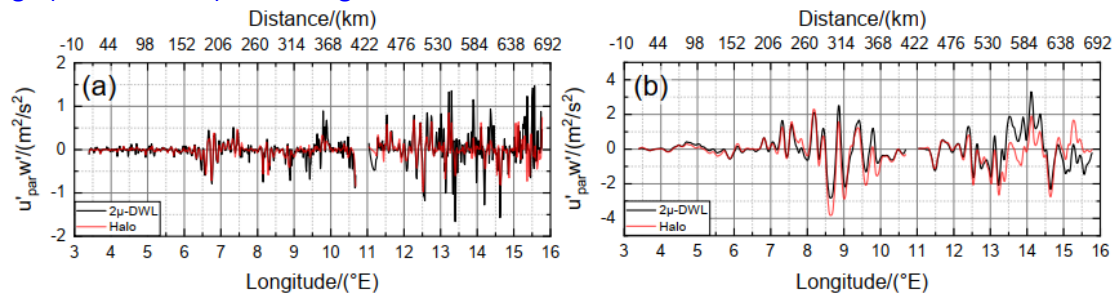

**Figure 10.**  $u'_{\text{par}} w'$  measured by the 2- $\mu\text{m}$  DWL (black) and Halo (red) at 7.8 km for the short-wave case (a) and the long-wave case (b), respectively.

For the short-wave case, both time series are undulating around zero and with similar amplitudes, thus, providing comparable leg-averaged momentum fluxes. For the longwave case, however, the  $u'_{\text{par}} w'$  patterns look comparable but show distinct deviations between 8.5° E and 10° E, and between 13° E and 15.5° E, where the 2- $\mu\text{m}$  DWL data tendentially provides more positive values compared to the Halo in-situ data. Though the root-cause of these deviations is not unequivocal proven, it is likely that they are caused by the discrepancy between both data sets that appear between 14° E and 15.5° E, where the HALO ground velocity and attitude is shown to change (see also Fig. 6). As the 2- $\mu\text{m}$  DWL ground returns in this region do not show an enhanced systematic error, the 2- $\mu\text{m}$  DWL results are considered to be reliable here (see also Fig. 7).

Somehow related to the previous comment, I have another concern associated with the filtering that is chosen to extract the wave disturbances from the raw observations. On line 252, it is stated that a "5th order polynomial" is used to determine the background wind. On a 700-km long leg, this will typically filter out wavelengths longer than 150 km. On the other hand, the authors note on line 257, while commenting Figure 7a), that the  $u_{\text{par}}$  wind varies with wavelength of about 400 km, as is also obvious in Figure 6 (upper right panel). What was the reason to filter out this wavelength? It might actually be that this wavelength is not associated with a trapped wave and might therefore be a better testbed for lidar and in-situ MF comparisons. This can be achieved by choosing a different filter to extract the fluctuations from the background, e.g. a simple straight line between end points of the raw observations.

On the other hand, I do not agree that this 400-km wavelength is also appearing in Figure 7b), as stated in l 258. It should have been filtered out from the disturbances!

Thanks a lot for this comment. Indeed, not only a 5<sup>th</sup> order polynomial was used for background subtraction, but an additional low pass filter. Realizing that, we carefully re-processed the data and used only a Butterworth filter for two defined wave classes for short waves (< 30 km) and long waves (> 30 km). Based on that, we revised the  $u'w'$  figures, the corresponding wavelet analysis, and the discussion about the retrieved results as described above.

## Other concerns

- The article discusses the same measurements than those studied in Gisinger et al. (2020, ref. cited), and shares a number of very similar figures (e.g. Fig 5, 7 and 9 in this paper, compared to Fig. 8, 9 and 10 in Gisinger et al.(2020)). This may be acknowledged since the Introduction, where the focus of this paper with respect to Gisinger et al. might be stressed.
  - The present paper intended to concentrate on the novel measurement technique procedure of the momentum flux profiles (AMT) whereas the paper by Gisinger et al., used a much broader data set and also simulations to perform a more science-related study. For completeness and also as a measurement example of the usefulness of the presented method, we decided to partly keep this content also in this publication but additionally acknowledged this both in the abstract as well as in the introduction. In particular, after defining the two different wave classes, we base all our discussion on the 2D-plot of  $u$ ,  $w$ , and  $u'w'$ , but exclude the additional wavelet analysis as it does not provide further conclusions. Furthermore, we keep the flux profile but calculate it for the two different wave classes. The publication of Gisinger et al is additionally acknowledged:
    - Abstract: ..., which are induced by interfacial waves as recently presented by Gisinger et al. 2020.
    - Introduction: Whereas this paper concentrates on the description of the novel measurement technique and the careful characterization of related uncertainties based on in-situ measurements, the scientific results based on the retrieved leg-averaged momentum flux profile have partly been published by Gisinger et al. 2020 but are kept in this paper for completeness.
- I. 37: This sentence is slightly confusing: only the projection of gravity-wave MFs \*on the flight direction\* can be estimated. In other words, the "par" direction is that of the flight, not that of the different wave packets. This probably needs to be reminded to the reader more explicitly. Of course, in the mountain-wave case presented here, the leg direction has been chosen to be along the expected direction of propagation of mountain wave packets (which might also be more explicitly highlighted).  
Thanks a lot for the hint. For further clarification, we added the following sentence:  
...as this would allow one to additionally quantify the propagation direction of the GWs and the corresponding momentum transport, especially when the flight leg direction is chosen such that it matches the expected propagation direction of excited GWs.
- I had difficulties in understanding the reasoning behind the "wind mode" and the "vertical wind speed" modes of the lidar, since 3D winds are already measured with the first mode (as far as I have understood). My understanding is that the horizontal resolution and the accuracy/precision of the retrieved vertical wind speed is different in both modes, but this is not explicated at first place in the paper. I would therefore recommend to provide further details on the two modes as soon as line 95-97, when lidar modes are first mentioned: e.g. wind mode means 3D wind vector with lower horizontal resolution than in the vertical mode. Writing this, I am yet not fully sure if the "Wind vector" data product reported in Table 1 is a 3D or 2D (horizontal) vector.
  - Though the different 2- $\mu$ m DWL scanning modes are explained in detail in the respective section, we fully agree that further explanation is needed earlier in the manuscript, to provide a better understandability. Thus, we added the following sentences to the manuscript:
    - Sec.2.2: ...with the 2- $\mu$ m DWL operating in wind-mode measuring both wind speed and wind direction with a horizontal resolution of  $\approx 8.4$  km and a vertical resolution of 100 m, hence, giving the possibility to investigate the inflow conditions based on the measured wind speed and wind direction.
    - On this leg, the 2 $\mu$  DWL performed in vertical-wind-mode where the laser beam is pointed to nadir-direction to measure the vertical wind speed with a horizontal resolution of 200 m and a vertical resolution of 100 m (see also Sect. 3.2), which enables to resolve the small-scale structure of the excited MWs.

- Commonly, the 2- $\mu\text{m}$  DWL is used to either measure the three-dimensional wind vector (wind-mode) or rather to measure the vertical wind speed (vertical-wind-mode). When operating in wind-mode, the velocity-azimuth display (VAD) scan technique is applied (Browning and Wexler, 1968) by performing a conical scan around the vertical axis with an off-nadir angle of  $20^\circ$ . Typically, one scanner revolution with 21 line-of-sight (LOS) measurements separated by  $18^\circ$  in the azimuth direction takes 175 about 42 s. By further considering the aircraft speed of about  $200 \text{ m s}^{-1}$ , the horizontal resolution of wind-mode observations is about 8.4 km, depending on the actual ground speed of the aircraft. Hence, the vertical velocity wind field, which is shaped by scales of tens of kilometers and smaller in the presence of MWs (Smith and Kruse, 2017), is not well resolved in wind mode data.
- I. 154: Related to the previous comment, this sentence is also confusing. "Simultaneous measurements of the horizontal and vertical wind speed" are already achieved in the "wind mode" if a 3D wind vector is retrieved. The advantage of the new scan pattern seems to me more associated with the horizontal resolution and the precision of the measurements rather than in their simultaneity.
  - We fully agree that it is not really the simultaneity but the higher horizontal resolution and the reduced representativeness error of the MF-mode measurements which make them beneficial. We clarified that by the previous and following adaptations:
  - However, it was also discussed that simultaneous measurements of the horizontal and the vertical wind speed with a horizontal resolution of a few hundred meters and a low representativeness error would be even more beneficial as such measurements would allow retrieving the vertical flux of horizontal momentum induced by GWs (Smith et al., 2008, 2016).
- I. 160-161: "flying along wind direction": I guess you had in mind the special case of mountain wave (in a homogeneous wind field). Either extend why it is important to fly along the wind direction here, or simply remove this since the MF scan technique does not request to fly along the \*wind\* direction. (see also my comment for I 37.)
  - We agree that the MF-mode measurements do not require a flight path along the in-flow direction. Thus, the sentence "and flying along wind direction," was removed. The particular explanation why the flight leg direction was planned along the wind direction for the MW event is given later in chapter 4.
- Equations 2 just look wrong to me. Starting from Eq. (1), I obtain different formulas:  

$$u_{\text{par}} = \csc(\theta_f - \theta_b) * (v_f \cos(\theta_b) - v_b \cos(\theta_f))$$

$$w = \csc(\theta_f - \theta_b) * (-v_f \sin(\theta_b) + v_b \sin(\theta_f))$$
  - Thanks a lot for reviewing Equations (1) and (2) so carefully as indeed two typos were present in Equation (2). Hence, Equation (2) was corrected according to:  

$$u_{\text{par}}(x, R) = \csc(\theta_{f_i} - \theta_{b_i})(v_{f_i} \cos \theta_{b_i} - v_{b_i} \cos \theta_{f_i})$$

$$w(x, R) = \csc(\theta_{f_i} - \theta_{b_i})(-v_{f_i} \sin \theta_{b_i} + v_{b_i} \sin \theta_{f_i})$$
 Further, it was verified that all the data processing was performed with the correct equations.
- Figure 5: Why are you using a different x-axis in this figure (4 to  $17^\circ\text{E}$ ) and in the following ones (3 to  $16^\circ\text{E}$ )?
  - Fig. 5 shows the vertical wind measurement from FL2, whereas Fig. 6 and Fig. 7 show the result from the MF-mode measurements acquired on FL3. As both flight legs do not have an identical length (see also Fig. 1) it is decided to change the x-axes scale to keep the maximum resolution. Hence, we would suggest keeping the x-axis scales as they are.



- Figure 8: I would recommend to reverse the rows in the figure in order to ease comparisons with Figure 7 for instance: i.e., put the top/bottom altitudes in the top/bottom panel.
  - As explained in the beginning, we decided to remove the figure about the wavelet analysis as it does not provide additional information for the presented discussion and as it is mostly presented already in Gisinger et al., 2020.
- Figure 8b: Since MF is a quadratic quantity, it varies horizontally with a wavelength that is half that of the wave-packet  $u'$  and  $w'$  disturbances. The interpretation of Figure 8b) in terms of "wavelengths" of the wave packet is therefore a bit confusing.
  - This figure and corresponding discussion was removed.

#### **Typos and minor concerns**

- l 28: Did GW-LCYCLE II campaign occurred in 2014? or in 2016 (see e.g. caption of Figure 1)??
  - It was in 2016, and the typo in the text was adapted accordingly.
- l. 178: the data \*are\* linear\*ly\* interpolated.
  - Adopted.
- l 226-228: Please refer to Figure 6 here.
  - Done.
